# Supplementary material for: Effect of Physical Activity on the Development and the Resolution of Nonalcoholic Fatty Liver in Relation to Body Mass Index
Source: Research Square preprint supplement (doi:10.21203/rs.3.rs-1136331/v1), 2021-12-29
Supplement: Supplementary file 2 [file 5bfdb95b65010f7a1570a775.docx]

Supporting figure legend

SUPPORTING FIG. S1. Spline curves displaying the risk of (A) resolution and (B) incidence of NAFLD in overall and the three activity groups (Model 3).
